# Supplementary material for: MYSM1-AR complex-mediated repression of Akt/c-Raf/GSK-3β signaling impedes castration-resistant prostate cancer growth
Source: publisher site journal article supplement (doi:10.18632/aging.102482), 2019-11-24
Supplement: Supplementary file [file aging-v11i22-102482-supplementary-material-SD1.pdf]

SUPPLEMENTARY FIGURES

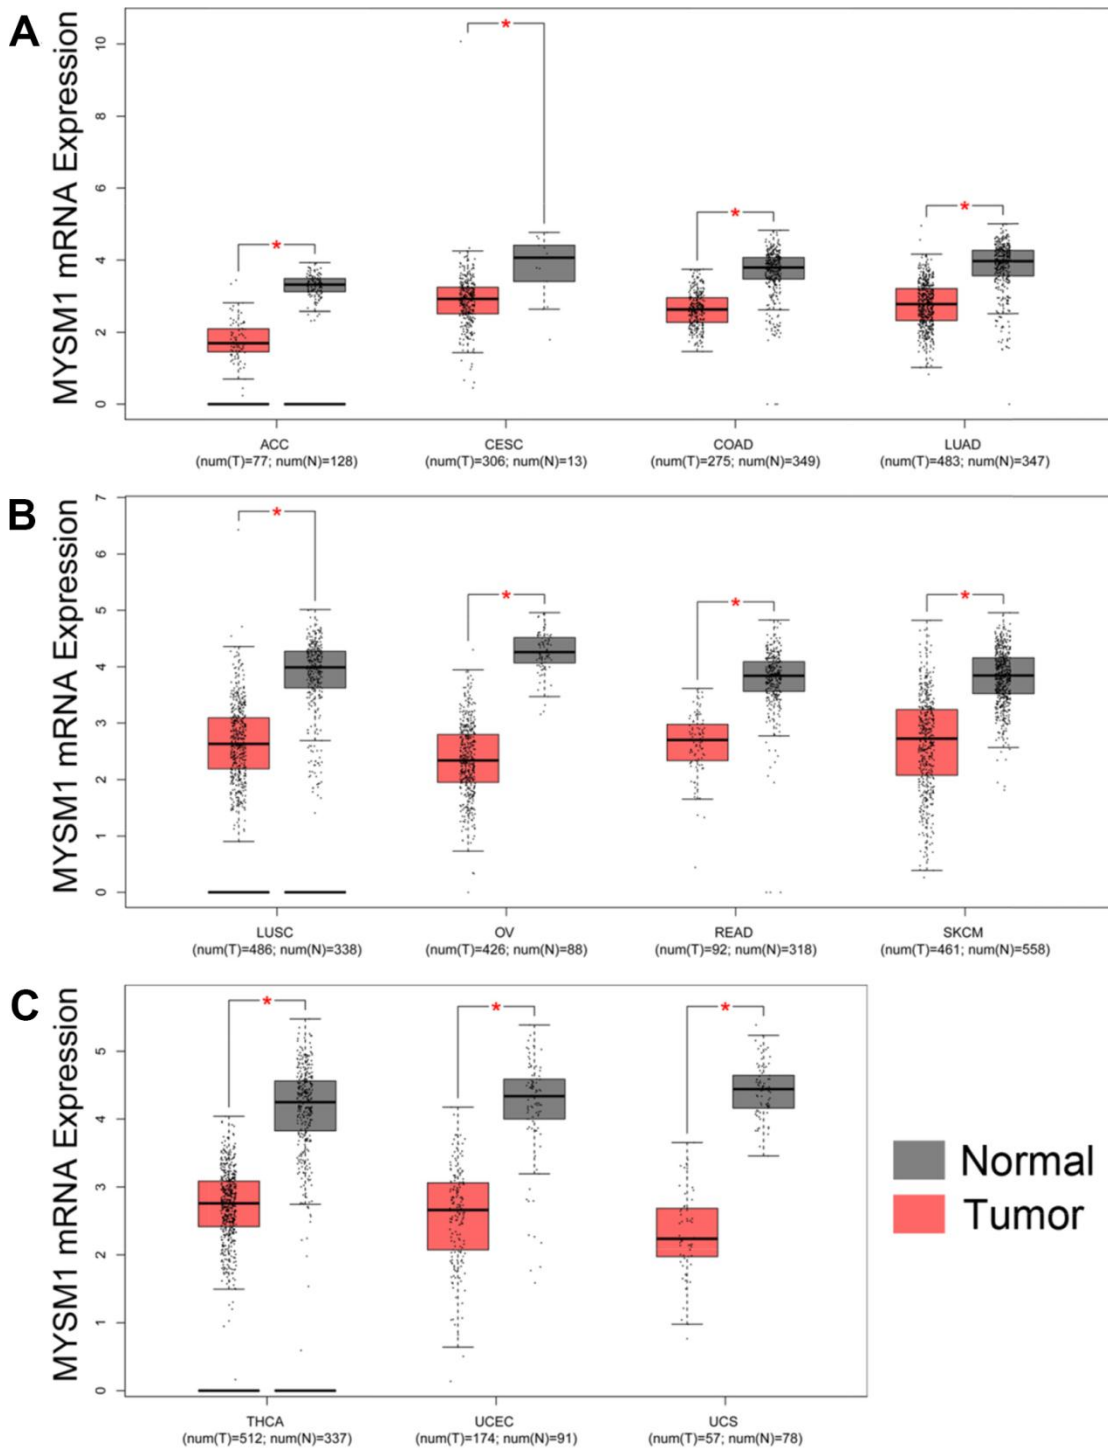

**Supplementary Figure 1.** MYSM1 is downregulated in numerous human tumors, including ACC, CESC, COAD, LUAD (A), LUSC, OV, READ, SKCM (B), THCA, UCEC and UCS (C). Data were acquired from TCGA database and analyzed via GEPIA bioinformatics.

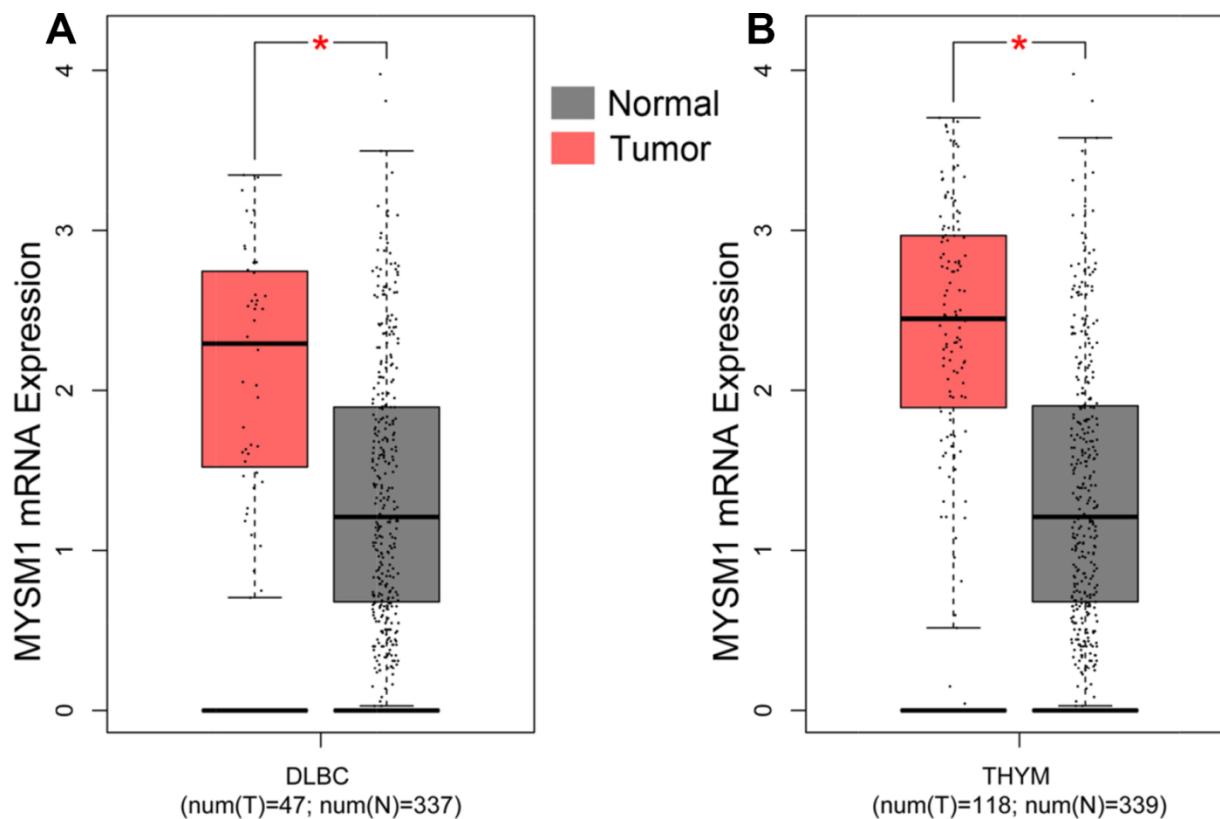

**Supplementary Figure 2.** Upregulated MYSM1 in DLBC (A) and THYM (B). Data were acquired from TCGA database and analyzed via GEPIA bioinformatics.

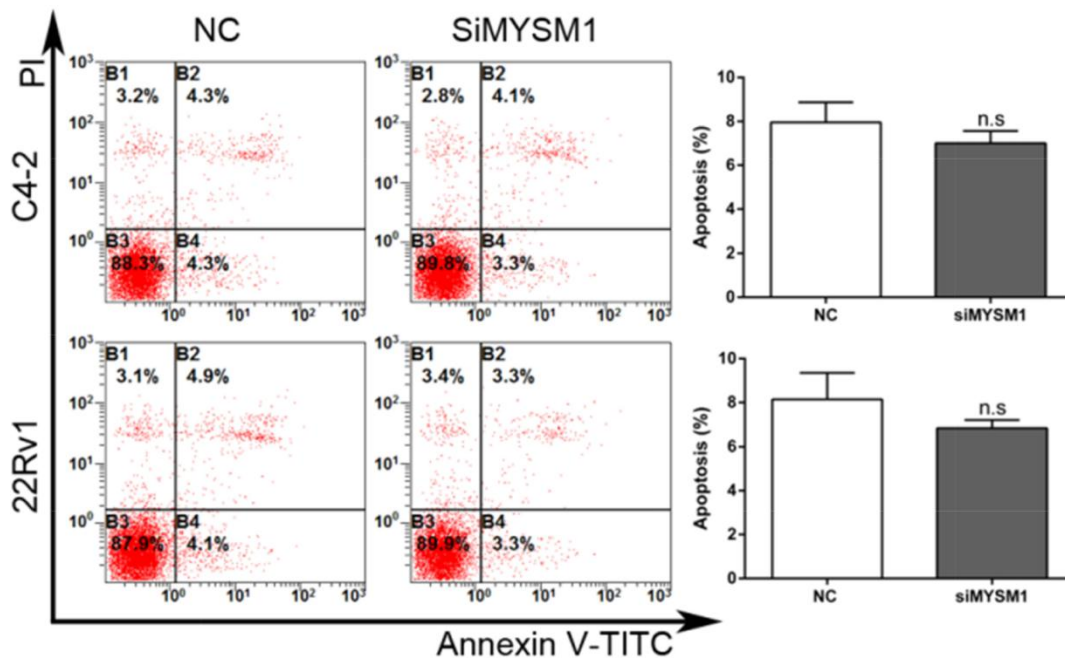

**Supplementary Figure 3.** Flow cytometry analysis of cell apoptosis in C4-2/22Rv1 cells treated with NC/siMYSM1. Data are shown as mean  $\pm$  SD of 3 replicates. n.s = no significance.
