# Supplementary material for: MYSM1-AR complex-mediated repression of Akt/c-Raf/GSK-3β signaling impedes castration-resistant prostate cancer growth
Source: publisher site journal article supplement (doi:10.18632/aging.102482), 2019-11-24
Supplement: Supplementary file [file aging-v11i22-102482-supplementary-material-SD2.pdf]

## SUPPLEMENTARY TABLES

**Supplementary Table 1. Information on PCa patient tissues collected for the study.**

| Patient number | ID Number | Gender | Age | PSA (ng/ml) | Gleason score |
|----------------|-----------|--------|-----|-------------|---------------|
| 1              | 14876718  | Male   | 72  | 24.74       | 5+3           |
| 2              | 14718613  | Male   | 67  | 41.47       | 4+3           |
| 3              | 14647229  | Male   | 71  | 24.99       | 4+3           |
| 4              | 14644672  | Male   | 65  | 31.97       | 4+3           |
| 5              | 14483052  | Male   | 65  | 13.96       | 3+3           |
| 6              | 14398145  | Male   | 82  | 0.754       | 3+4           |
| 7              | 13624506  | Male   | 66  | 25.18       | 4+3           |
| 8              | 11919601  | Male   | 71  | 14.7        | 3+4           |
| 9              | 14931329  | Male   | 53  | 43.25       | 4+3           |
| 10             | 14107451  | Male   | 74  | 38.7        | 4+3           |
| 11             | 14076409  | Male   | 70  | 13.41       | 3+4           |
| 12             | 14845766  | Male   | 67  | 9.77        | 4+3           |
| 13             | 14233999  | Male   | 72  | 19.46       | 5+4           |

**Supplementary Table 2. Sequences of the oligonucleotides in this study.**

| Oligonucleotides | Sense (5'-3')/Target sequence | Antisense (5'-3')     |
|------------------|-------------------------------|-----------------------|
| siNC             | UUCUCCGAACGUGUCACGUTT         | ACGUGACACGUUCGGAGAATT |
| siMYSM1          | CCGGCCAUAAUCUUCAAGUTT         | ACUUGAAGAUUAUGGCCGTT  |
| shNC             | TTCTCCGAACGTGTCACGT           |                       |
| shMYSM1#1        | CCAATCAAGGAGAATTCAT           |                       |
| shMYSM1#2        | CCAGAACAGGAAATAGAAA           |                       |

**Supplementary Table 3. Primers used for qRT-PCR analyses in this study.**

| Gene           | Forward (5'-3')      | Reverse (5'-3')      |
|----------------|----------------------|----------------------|
| MYSM1          | CACAGGTACCCACATTGCTG | CTGTATCATAGGCCCCCTCA |
| AR             | ATTGCGAGAGAGCTGCATCA | GGGCACTTGCACAGAGATGA |
| PHLPP1         | GCAGGAAAACCTCACAGCA  | AGGATGACTTGGCGTCTTGT |
| $\beta$ -actin | TGGCATCCACGAACTACC   | GTGTTGGCGTACAGGTCTT  |

**Supplementary Table 4. Antibodies used for Western blot analysis, Co-immunoprecipitation and Immunohistochemistry in this study.**

| <b>Antigen</b>  | <b>Species</b> | <b>Applications and dilutions</b>         | <b>Source</b>                    |
|-----------------|----------------|-------------------------------------------|----------------------------------|
| IgG             | Rabbit         | 3µg in Co-IP                              | Cell Signaling Technology #2729  |
| MYSM1           | Rabbit         | WB (1:1000);<br>3µg in Co-IP              | Abcam # ab193081                 |
| MYSM1           | Rabbit         | IHC (1:60)                                | Sangon Biotech #D261010          |
| AR              | Rabbit         | WB (1:1000); IHC (1:250);<br>3µg in Co-IP | Abcam # ab108341                 |
| Akt(pan)        | Rabbit         | WB (1:1000)                               | Cell Signaling Technology #4691  |
| p-Akt(Ser473)   | Rabbit         | WB (1:1000); IHC (1:100)                  | Cell Signaling Technology #4060  |
| p-Akt(Thr308)   | Rabbit         | WB (1:1000)                               | Cell Signaling Technology #13038 |
| c-Raf           | Rabbit         | WB (1:1000)                               | Cell Signaling Technology #9422  |
| p-c-Raf(Ser259) | Rabbit         | WB (1:1000)                               | Cell Signaling Technology #9421  |
| GSK-3β          | Rabbit         | WB (1:1000)                               | Cell Signaling Technology #9315  |
| p-GSK-3β(Ser9)  | Rabbit         | WB (1:1000)                               | Cell Signaling Technology #5558  |
| p-PDK1(Ser241)  | Rabbit         | WB (1:1000)                               | Cell Signaling Technology #3438  |
| Ki-67           | Mouse          | IHC (1:400)                               | Cell Signaling Technology #9449  |
| β-actin         | Mouse          | WB (1:2000)                               | Sigma-Aldrich A1978              |
| Anti-rabbit IgG | Goat           | WB (1:5000)                               | Jackson ImmunoResearch #124791   |
| Anti-mouse IgG  | Goat           | WB (1:5000)                               | Genshare Biological #JC-PB002H   |
